# Supplementary material for: Growth of fibrous aggregates of silica nanoparticles: Fibre growth by mimicking the biogenic silica patterning processes
Source: Royal Society of Chemistry journal article supplement (doi:10.1039/b905178c), 2009-01-01
Supplement: b905178c.pdf [file b905178c.pdf]

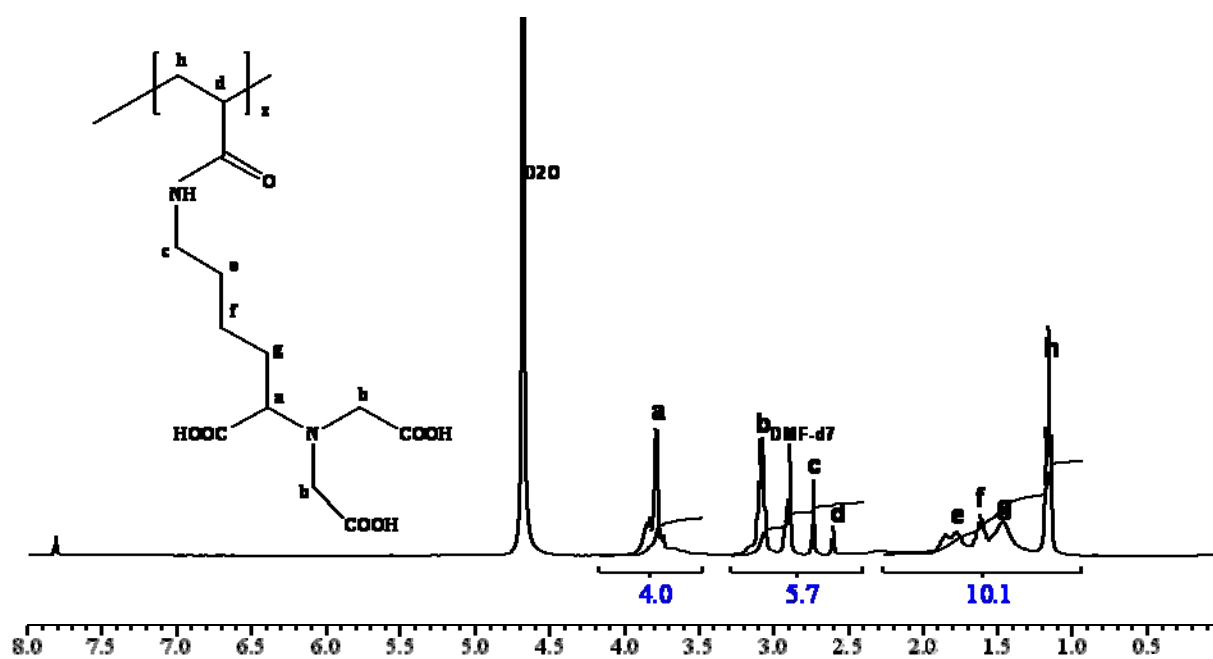

**Supplementary Figure 1.**  $^1\text{H}$  NMR spectrum of the polymeric ligand

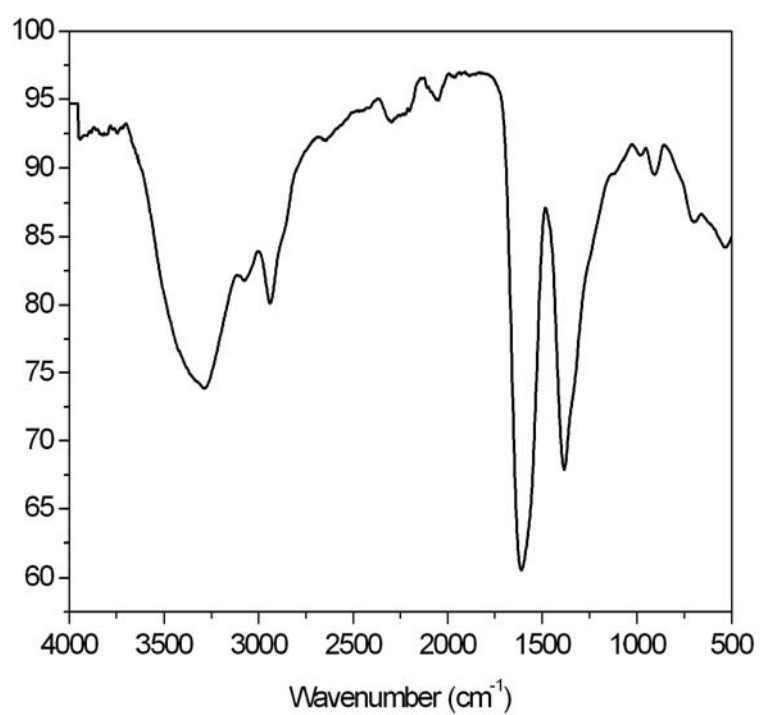

**Supplementary Figure 2.** FT-IR spectrum of the polymeric ligand.

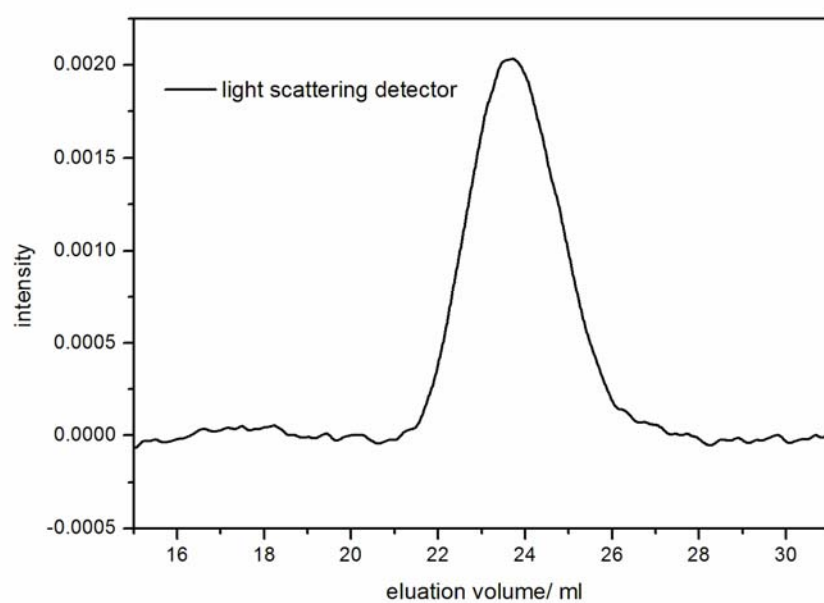

**Supplementary Figure 3.** GPC data of the polymeric ligand.

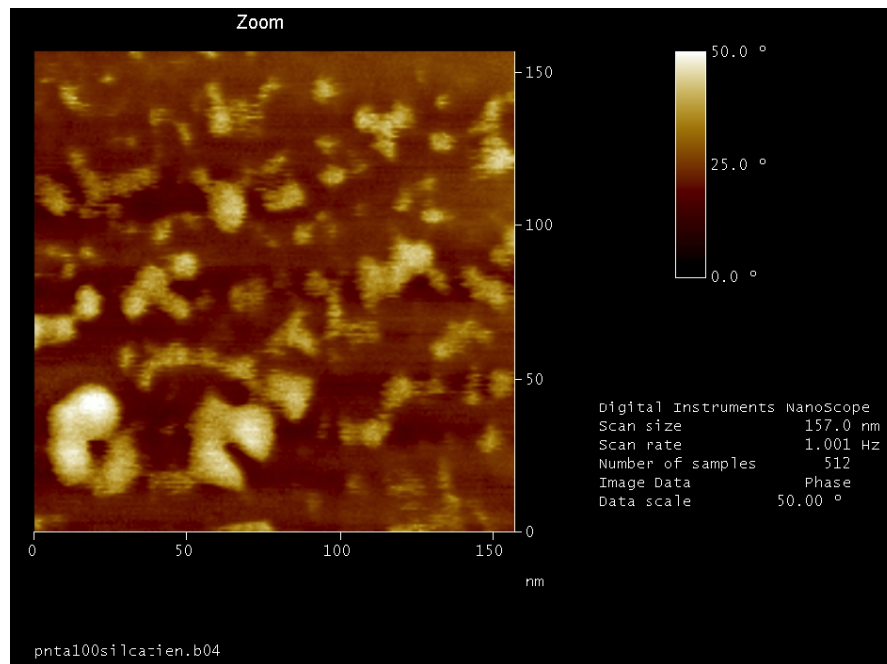

**Supplementary Figure 4.** Scanning force microscopy (SFM) height image of the polymer backbone with silicatein side chains.
